# Supplementary material
Source: publisher figshare collection journal article supplement (https://tandf.figshare.com/ndownloader/files/13236614)
Supplement: Supplementary file 1 [file 13236614]

Supporting Information

Crystal structures and luminescent properties of a cadmium(II) metal-organic framework based on tri(4-pyridylphenyl)amine

JUN-FENG LI, XIU-DIAN XU, ZE-YU ZHOU, LI-ZHUANG CHEN and FANG-MING WANG*


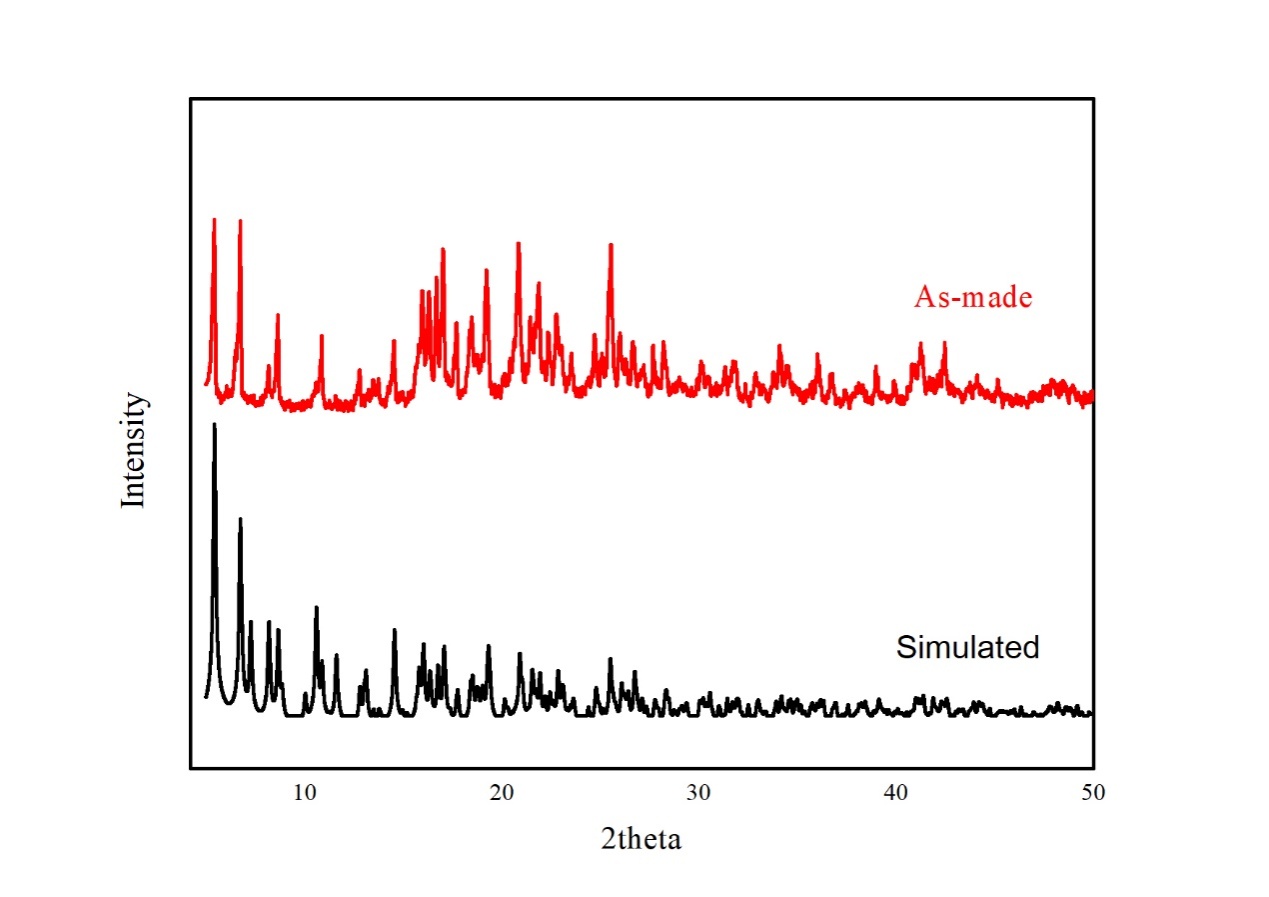


Figure S1. PXRD curve of **1**.


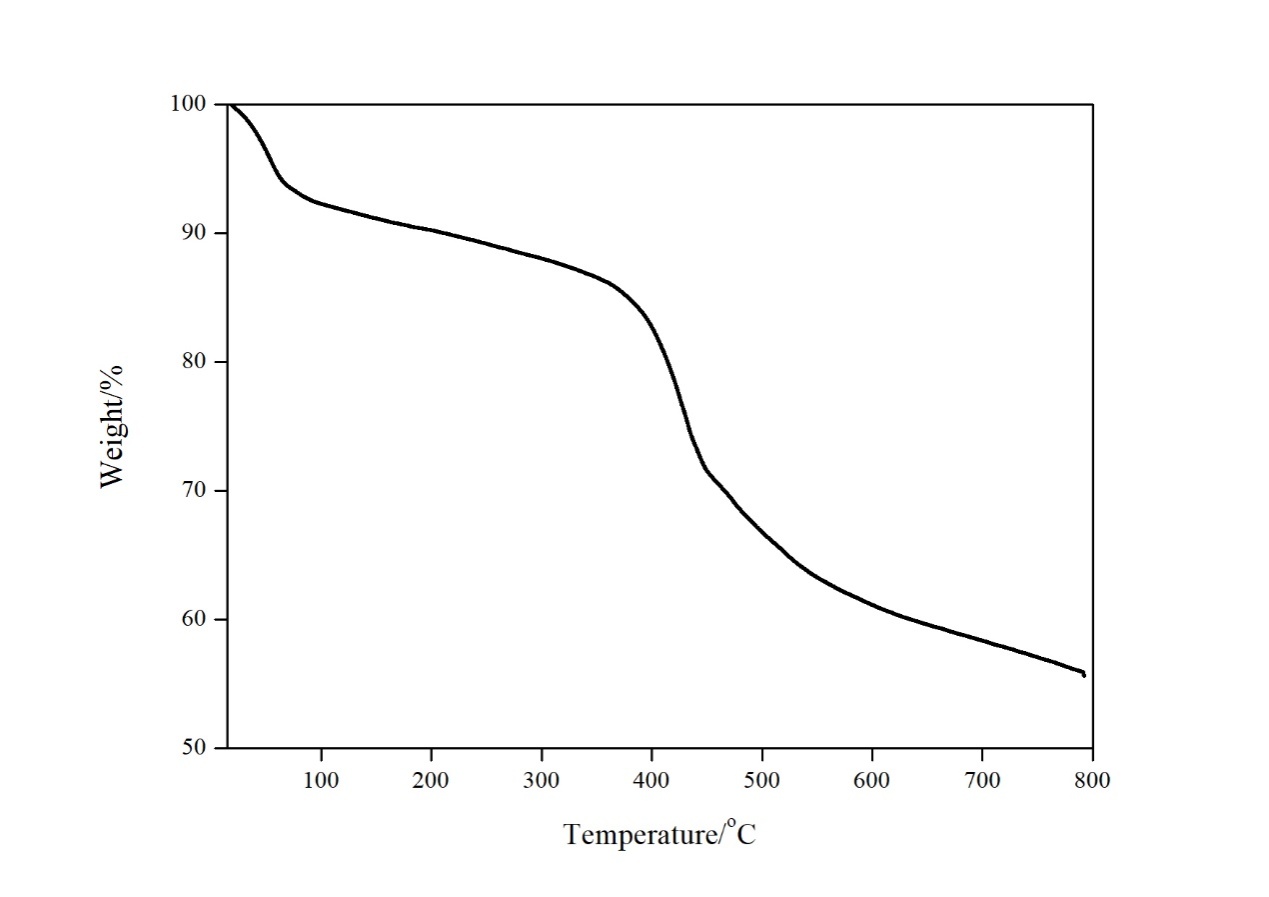


Figure S2. TG curve of **1**.


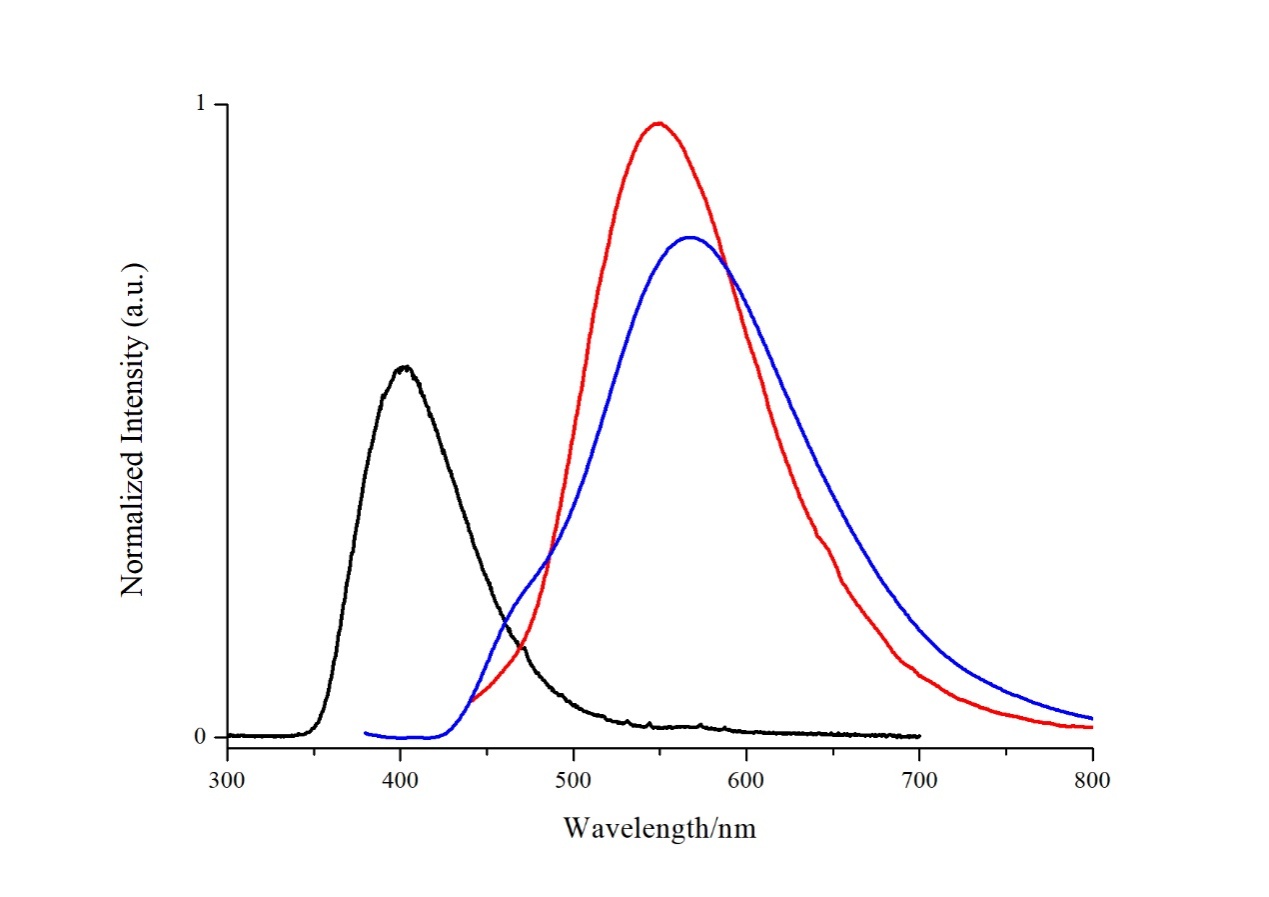


Figure S3. Emission spectra of bpdc (black), tppa (red), **1** (blue) (λex = 455 nm).
